# Supplementary material for: How long is too long? Examining waiting times and stress in human-elevator interaction
Source: PeerJ. 2025 Aug 18;13:e19913. doi: 10.7717/peerj.19913 (PMC12369606; doi:10.7717/peerj.19913)
Supplement: Supplemental Information 1 — The raw data shows perceived waiting time, perceived stress in waiting, perceived transit time, perceived stress in transit, actual waiting time, and actual transit time. [file peerj-13-19913-s001.xlsx]

## Sheet: Sheet1
	Number	Perceived waiting time	Perceived stress in waiting	Perceived transit time	Perceived stress in transit	Actual waiting time	Actual transit time	The number of people riding together		ID	FirstHalfPerceivedWaitingTime	LastHalfPerceivedWaitingTime	FirstHalfActualWaitingTime	LastHalfActualWaitingTime	FirstHalfPerceivedTransitTime	LastHalfPerceivedTransitTime	FirstHalfActualTransitTime	LastHalfActualTransitTime	FirstHalfWaitingStress	LastHalfWaitingStress	FirstHalfTransitStress	LastHalfTransitStress	AveragePerceivedWaitingTime	AverageActualWaitingTime	AverageWaitingStress	AveragePerceivedTransitTime	AverageActualTransitTime	AverageTransitStress
1	1	32	3	6	1	46	13	5		1	55.9583	46.7917	67.8333	66.7717	13.2917	15.5	19.3333	21.0933	3.95833	1.54167	1.45833	0.208333	51.375	67.3025	2.75	14.3958	20.2133	0.833333
1	2	60	4	11	1	90	18	1		2	64.2609	58.6087	72.7292	64.2746	17.0417	22.9583	21.7617	27.5492	7.95833	8.375	2.86957	4.25	61.4348	68.5019	8.16667	20	24.6554	3.57447
1	3	52	3	6	0	76	14	1		3	43.5833	37	72.7292	60	14.5	11.0833	21.7617	24.7083	6.79167	4.95833	5.54167	4.25	40.2917	66.3646	5.875	12.7917	23.235	4.89583
1	4	26	3	12	1	38	17	2		4	44.375	47.3043	62.2083	59.5562	15.125	20.5833	29	26.5883	2.95833	5.66667	1.91667	5.41667	45.8085	60.8823	4.3125	17.8542	27.7942	3.66667
1	5	42	3	6	0	85	12	2		5	37.2083	44	56.2413	59.5879	12.5833	10.875	24.8313	20.1892	7.41667	7	3.5	2.20833	40.6042	57.9146	7.20833	11.7292	22.5102	2.85417
1	6	81	5	7	1	101	12	2		6	49.7917	62.7083	64.0288	71.7833	17.5833	18.625	22.1663	18.3	2.55	3.73913	1.47826	2.75	56.25	67.906	3.18605	18.1042	20.2331	2.12766
1	7	15	2	7	2	16	23	0		7	57	49.125	63.6638	54.1571	46.2174	20.125	23.3721	21.5475	4.31579	4.54167	2.80952	1.83333	52.9787	58.9104	4.44186	32.8936	22.4598	2.28889
1	8	82	5	8	2	74	12	2		8	53.2083	60.6667	58.9338	70.7733	22.25	18.75	25.33	23.2117	7.08696	6.58333	4.625	3.08333	56.9375	64.8535	6.82979	20.5	24.2708	3.85417
1	9	68	4	41	4	89	53	2		9	50.8333	57.0833	62.4233	66.0488	13.0833	15	21.0237	21.8775	7.625	9.42105	4.20833	6.47826	53.9583	64.236	8.4186	14.0417	21.4506	5.31915
1	10	51	4	9	1	56	19	1		10	43.1053	51.4091	62.1168	63.6163	6.91667	10.4286	20.5595	22.7629	4.41667	8.16667	4.20833	8.33333	47.561	62.8991	6.29167	8.55556	21.7091	6.27083
1	11	49	3	8	2	45	12	2		11	52.7917	57.5	53.1946	61.5217	21.5833	22	26.4013	26.5583	1.25	9.125	0.416667	4.04167	55.1458	57.3581	5.1875	21.7917	26.4798	2.22917
1	12	58	4	18	1	60	21	2		12	58.5417	55.5833	66.8	67.1779	20.3333	12.5217	28.0608	25.2921	9.17391	8.58333	5.125	2.47826	57.0625	66.989	8.87234	16.5106	26.6765	3.82979
1	13	61	4	30	3	76	53	2		13	33.7917	39.7917	61.9558	61.7754	11.9167	7.54167	19.2471	21.6887	1.83333	2.625	0.458333	1.25	36.7917	61.8656	2.22917	9.72917	20.4679	0.854167
1	14	105	7	20	1	107	13	1		14	59.7917	64.7083	65.0079	62.0996	23.9583	19.4583	23.5658	22.8808	2.375	3.29167	0.541667	0.833333	62.25	63.5538	2.83333	21.7083	23.2233	0.6875
1	15	32	3	10	3	29	12	3		15	67.3333	73.6957	62.3604	67.4417	21.25	19.0833	24.0946	20.1192	7.17391	4.33333	4.13043	2.125	70.4468	64.901	5.7234	20.1667	22.1069	3.10638
1	16	47	4	6	1	67	13	3		16	54.7917	55.9167	60.9558	64.5758	13.4583	12.5417	24.3825	26.7004	2.36364	2.41667	0.583333	0.458333	55.3542	62.7658	2.3913	13	25.5415	0.520833
1	17	61	5	10	1	69	13	2		17	41.375	42.5833	52.8354	59.1746	12.6957	13.7917	25.6325	22.1175	6.38095	5	2.16667	1.33333	41.9792	56.005	5.64444	13.2553	23.875	1.75
1	18	62	4	7	1	72	12	4		18	46.0833	47.9583	68.5758	63.5229	17.7917	15.5833	27.2162	22.9454	5.91304	8.43478	3	5.40909	47.0208	66.0494	7.17391	16.6875	25.0808	4.15217
1	19	79	5	9	1	99	12	3		19	45.5	35.6667	62.4442	60.5722	18.3333	12.8261	27.9192	21.6104	4.95652	3.70833	1.91667	2.40909	40.5833	61.5281	4.31915	15.6383	24.8319	2.15217
1	20	60	4	23	2	75	31	2		20	47.5833	48.125	63.5858	61.8883	13.2917	12.375	21.3779	20.1017	5.58333	5.70833	0.875	1.58333	47.8542	62.7371	5.64583	12.8333	20.7398	1.22917
1	21	83	6	17	2	90	22	2		21	49.1667	44.375	57.99	58.2642	20.5833	12.375	30.6429	22.4729	1.375	0.958333	0.583333	0.291667	46.7708	58.1271	1.16667	16.4792	26.5579	0.4375
1	22	84	5	15	1	93	16	3		22	52.25	51.5417	63.3308	61.3846	17.4167	18.375	25.0779	27.3346	2.5	2.625	0.958333	1.04167	51.8958	62.3577	2.5625	17.8958	26.2062	1
1	23	16	2	25	2	26	28	3		23	70.5833	67.5417	67.1761	65.4587	19.5417	18.6667	21.0252	24.1921	6.125	6.70833	2.70833	3.875	69.0625	66.2991	6.41667	19.1042	22.6423	3.29167
1	24	37	3	8	1	49	13	2		24	60.5833	46.6538	68.4104	62.9088	15.75	16.8846	21.2521	26.515	7.70833	2.16	1.79167	0.461538	53.34	65.5496	4.87755	16.34	23.9888	1.1
1	25	37	1	9	1	41.63	11.58	4		25	41.7619	41.5	66.3059	68.3942	12.4091	10.9583	25.075	21.0008	7.28571	6.45833	4.09091	2.70833	41.6222	67.3954	6.84444	11.6522	22.9493	3.36957
1	26	56	2	8	1	63.67	11.27	3		26	42.625	36.25	58.9296	56.8467	9.08333	10.7083	19.9713	22.6654	4.66667	3.29167	2.625	2.29167	39.4375	57.8881	3.97917	9.89583	21.3183	2.45833
1	27	41	2	9	1	50.73	11.53	3		27	41.2727	37.4545	66.2405	63.15	6.63636	7.33333	20.9238	25.4859	0.65	1.05556	0	0.0555556	39.3636	64.6593	0.842105	6.97674	23.2579	0.0263158
1	28	50	2	8	0	62.1	12.37	2		28	82.3333	72.3333	69.9992	72.5904	28.6667	23.2083	26.475	20.5954	4.33333	3.79167	0.916667	0.125	77.3333	71.2948	4.0625	25.9375	23.5352	0.520833
1	29	9	1	22	1	32.17	31.5	0		29	50.4167	51.5417	56.6117	57.3604	19.0417	34.75	25.9767	30.0083	2.79167	2.75	2.25	2.43478	50.9792	56.986	2.77083	26.8958	27.9925	2.34043
1	30	52	1	20	1	64.03	33.32	3		30	40.375	40.0833	63.0783	53.6275	18.9167	11.75	26.4833	21.6483	3.625	3.95833	2.95833	2.70833	40.2292	58.3529	3.79167	15.3333	24.0658	2.83333
1	31	60	1	8	0	90.7	16.63	1
1	32	53	1	12	0	79.37	14.63	2
1	33	25	0	20	0	23.88	31.7	3
1	34	47	1	23	0	60.3	32.5	1
1	35	51	1	26	0	72.57	33.68	2
1	36	94	3	8	0	135.72	14.53	3
1	37	65	2	10	0	89.07	17.13	3
1	38	34	1	29	0	43.87	48.68	3
1	39	54	3	11	0	90.2	10.83	2
1	40	74	2	20	0	108.8	25.98	1
1	41	49	2	9	0	85.73	11.63	1
1	42	60	3	21	0	93.9	33.07	2
1	43	47	2	30	0	65.63	45.82	1
1	44	48	2	8	0	74.23	10.83	1
1	45	50	2	8	0	83.7	10.23	2
1	46	4	0	36	0	1.13	12.13	2
1	47	16	0	8	0	20.99	11.3	2
1	48	47	2	9	0	68.4	13.37	3
2	1	27	1	12	4	41.63	55.21	2
2	2	72	10	50	10	76.97	15.67	2
2	3	79	10	13	3	55.47	14.93	3
2	4	72	9	10	0	68.53	32	4
2	5	42	5	13	0	16.4	18.13	2
2	6	182	10	4	0	96.87	57.93	2
2	7	84	9	8	0	75.13	19.13	2
2	8	43	7	19	5	86	11.87	3
2	9	48	8	6	0	60.3	15	2
2	10	68	10	7	0	76.33	15.6	2
2	11	30	7	3	0	114.4	11.6	2
2	12	36	7	6	0	98.4	13.27	1
2	13	18	4	9		33	17.8	3
2	14	80	10	12	0	43.87	13.6	3
2	15	42	7	46	6	86.53	16.27	1
2	16	69	7	12	1	26.87	11	2
2	17	51	5	12	2	32.47	13.27	2
2	18	63	6	26	5	34.53	11.73	2
2	19	89	10	15	1	93.6	13.33	2
2	20	58	10	38	10	189.27	46.47	2
2	21	78	10	32	7	84.8	31.07	1
2	22	82	10	24	4	89.33	28.2	2
2	23	65	9	24	8	68.07	26.8	1
2	24		10	8	0	96.73	12.4	1
2	25	32	7	38	10	45.96	50.94	2
2	26	50	10	34	7	73.69	36.39	1
2	27	59	10	25	5	77.25	34.5	3
2	28	67	10	9	1	79.79	13.79	1
2	29	82	10	8	5	101.31	14.44	2
2	30	60	10	8	3	55.78	14.69	3
2	31	62	9	12	0	78.69	35.33	3
2	32	102	10	10	0	91.15	12.71	1
2	33	29	6	8	0	91.09	18.16	1
2	34	46	6	28	4	89.46	12.86	3
2	35	29	5	10	3	22	12.29	3
2	36	32	4	12	0	45.91	34.33	2
2	37	22	6	11	3	24.07	14.47	4
2	38	31	6	24	10	28.12	12	4
2	39	62	8	5	5	28.47	11.86	2
2	40	82	10	58	7	32.81	35.51	4
2	41	49	9	18	5	61.22	17.51	4
2	42	82	10	8	0	72.26	70.68	1
2	43		10	66	10	79.84	34.55	1
2	44	76	10	31	7	102.02	47.7	3
2	45	98	10	37	7	74.68	13.81	3
2	46	78	10	11	0	36.95	8.91	1
2	47	70	10	54	6	71.72	52.84	2
2	48	48	5	26	4	78.35	50.91	3
3	1	15	4	33	6	41.63	55.21	2
3	2	60	7	5	3	76.97	15.67	2
3	3	40	6	30	6	55.47	14.93	3
3	4	35	5	4	6	68.53	32	4
3	5	15	6	5	3	16.4	18.13	2
3	6	76	8	4	5	96.87	57.93	2
3	7	65	9	40	7	75.13	19.13	2
3	8	65	9	15	6	86	11.87	3
3	9	75	9	25	7	60.3	15	2
3	10	50	8	15	5	76.33	15.6	2
3	11	10	5	3	3	114.4	11.6	2
3	12	45	6	6	4	98.4	13.27	1
3	13	30	4	7	6	33	17.8	3
3	14	60	6	20	6	43.87	13.6	3
3	15	25	7	20	6	86.53	16.27	1
3	16	43	8	20	8	26.87	11	2
3	17	60	9	12	5	32.47	13.27	2
3	18	35	8	8	5	34.53	11.73	2
3	19	40	6	8	5	93.6	13.33	2
3	20	55	7	15	7	189.27	46.47	2
3	21	42	7	7	6	84.8	31.07	1
3	22	30	6	25	8	89.33	28.2	2
3	23	60	9	15	7	68.07	26.8	1
3	24	15	4	6	3	96.73	12.4	1
3	25	9	8	15	6	46	48	2
3	26	30	5	3	3	74	20	2
3	27	10	3	2	1	15	13	1
3	28	47	7	18	6	85	38	2
3	29	62	7	25	5	85	32	2
3	30	50	5	5	5	97	14	3
3	31	50	4	3	2	79	14	4
3	32	50	6	5	4	84	12	1
3	33	20	4	3	6	22	13	3
3	34	15	4	5	3	25	17	3
3	35	60	4	3	4	66	13	3
3	36	40	3	10	5	65	31	3
3	37	30	4	10	5	46	31	2
3	38	15	4	3	3	24	13	4
3	39	15	5	5	4	28	13	4
3	40	70	7	5	3	107	15	4
3	41	50	3	70	6	61	75	1
3	42	40	3	15	5	79	34	2
3	43	50	6	25	6	72	52	1
3	44	60	8	6	4	92	15	1
3	45	20	4	15	4	22	16	2
3	46	35	6	8	4	68	14	2
3	47	50	6	4	3	72	9	2
3	48	10	3	3	5	26	41	3
4	1	27	4	10	1	46	30	4
4	2	16	2	6	1	24	18	2
4	3	39	1	4	0	74	10	2
4	4	40	2	13	0	68	30	2
4	5	39	2	13	0	68	28	1
4	6	20	0	7	0	28	11	2
4	7	15	0	10	0	32	25	1
4	8	72	1	30	0	114	81	2
4	9	60	1	52	2	89	97	3
4	10	36	0	25	0	66	53	2
4	11	42	0	12	0	60	23	2
4	12	61	3	20	3	76	31	4
4	13	71	3	5	1	26	13	4
4	14	30	3	5	1	107	12	4
4	15	44	4	25	3	61	46	2
4	16	50	5	10	3	70	13	2
4	17	25	4	7	3	30	12	2
4	18	60	5	20	4	72	31	4
4	19	20	4	20	4	27	27	1
4	20	70	6	25	4	86	37	2
4	21	60	4	20	5	68	32	1
4	22	60	6	8	4	76	13	2
4	23	73	6	8	4	78	10	2
4	24	35	5	8	3	47	13	1
4	25	35	5	25	5	41.63	29.67	3
4	26	15	5	20	4	13.33	31.33	3
4	27	40	7	7	4	50.7	12.4	3
4	28	70	6	20	3	62.07	29.6	1
4	29	60	5	10	5	85.27	17.4	2
4	30	20	4	8	5	26.67	10.27	3
4	31	15	4	5	4	22.3	13	2
4	32	50	5	5	5	65	13.73	2
4	33	50	4	50	7	60.6	90.8	2
4	34	8	7	20	5	54.2	32.8	1
4	35	40	6	150	7	67.2	62	2
4	36	80	7	20	8	86.13	26.07	1
4	37		9	35	8	39.13	52.13	1
4	38	80	5	10	5	102.67	13.67	1
4	39	50	4	10	5	90.4	18.13	1
4	40	70	6	6	5	106.47	13.87	1
4	41	40	7	5	5	43.4	11.13	2
4	42	50	7	6	6	65.47	15.53	2
4	43	30	6	15	5	15.47	17.6	2
4	44	70	6	20	7	73.73	51.13	2
4	45	50	5	25	5	64.2	32.73	2
4	46	60	6	6	7	68.37	16.13	3
4	47	60	5	10	5	72.67	15.07	3
4	48	45	5	6	5	52.27	11.93	1
5	1	45	8	17	5	45.96	30.13	4
5	2	41	9	14	2	24.19	18.88	2
5	3	30	7	7	6	74.32	12.4	2
5	4	35	7	30	9	67.96	31	2
5	5	20	7	10	5	68.14	14.04	2
5	6	20	6	10	3	58.78	50.26	2
5	7	25	8	6	3	31.82	35.08	3
5	8	31	7	6	2	78.66	35.88	3
5	9	15	4	15	5	27.68	17.74	1
5	10	52	9	20	8	103.36	34.84	3
5	11	15	6	7	0	65.56	33.84	2
5	12	63	9	17	5	72.1	11.92	3
5	13	27	6	10	2	45.84	15.28	3
5	14	84	9	7	6	53.06	50.16	4
5	15	20	10	6	2	28.44	10.9	2
5	16	24	6	11	7	32.81	34.22	4
5	17	50	9	10	2	61.07	9.82	4
5	18	45	9	21	3	72.2	28.08	3
5	19	45	9	7	1	68.7	13.74	2
5	20	31	6	7	1	72.39	13.32	4
5	21	55	8	12	2	26.91	11.38	2
5	22	55	9	21	2	5.4	28.6	3
5	23	45	6	7	1	74.68	31.86	2
5	24	20	4	24	2	89.76	22.58	2
5	25	45	7	7	2	41.63	15.27	4
5	26	40	7	10	1	63.67	12.6	3
5	27	30	7	32	7	50.7	55.53	3
5	28	40	8	18	6	68.53	30.73	4
5	29	50	9	5	1	66.73	10.07	1
5	30	3	1	21	6	0.27	50.4	1
5	31	63	9	24	6	97.67	36.13	2
5	32	45	9	14	2	60.67	27.8	3
5	33	21	5	10	2	22.27	15.2	2
5	34	40	7	7	1	54.07	11.4	2
5	35	50	8	9	1	74.27	15.07	2
5	36	96	10	3	1	135.6	15.07	3
5	37	23	5	10	1	36.47	11.67	1
5	38	3	1	15	3	1.53	32.73	3
5	39	30	5	16	2	43.83	30.4	3
5	40	66	8	7	2	89.53	11.53	1
5	41	69	9	5	1	104.67	12.53	1
5	42	55	9	6	1	90.8	11.27	2
5	43	30	4	5	1	22.73	9	1
5	44	23	5	9	2	30.67	15.67	1
5	45	56	9	6	1	76	11.87	2
5	46	66	9	10	1	99.07	16.67	2
5	47	50	9	7	1	1.13	10.4	2
5	48	62	8	5	1	97.6	15.53	2
6	1	10	3	15	4	19.47	19.87	5
6	2	50		10	1	78.47	10.47	1
6	3	50	2	30	4	69.07	42.25	4
6	4	60	4	3	0	85.38	9.75	2
6	5	50	3	30	2	101	49	1
6	6	30	3	10	1	68.13	14.5	1
6	7	60	3	25	2	99.88	26.25	1
6	8	60	2	10	0	86.63	16.25	1
6	9	10	1	10	0	21	7.25	3
6	10	30	2	12	0	29.75	11.63	2
6	11	75		25	2	76.38	31.5	2
6	12	120	3	30	1	76.63	42.25	2
6	13	60		15	1	76	11.5	2
6	14	50		10	1	72.38	7.75	2
6	15	20	1	15	1	19	17.25	3
6	16	30	2	20		54	16.88	3
6	17	60	3	10	1	76.13	30.25	2
6	18	20	2	15	2	89.5	33.75	1
6	19	50	7	25	2	79.38	16.38	1
6	20	80	2	30	2	27.75	13.88	2
6	21	60	2	10	1	47.5	12.25	2
6	22	60	2	20	2	65.13	30.5	2
6	23	50	2	30	3	69.5	50.75	3
6	24	50	2	12	1	48.63	9.88	0
6	25	30	2	10	1	19	10.25	5
6	26	70	3	10	1	81.38	8.75	2
6	27	60	3	10	2	67.5	12.13	2
6	28	70	2	10	2	114.13	9.88	2
6	29	60	2	10	1	81.75	10.5	1
6	30	80	2	35	4	96.63	30.63	2
6	31	80	6	10	2	81	13.25	2
6	32	80	7	20	4	95.25	11.63	2
6	33	20	2	10	2	19.25	9.38	1
6	34	70	3	25	3	77.5	15.88	1
6	35	75		10	1	71.5	13.88	1
6	36	60	4	10	3	61.13	9.63	3
6	37	50	8	10	2	59.63	10.13	3
6	38	60	3	25	8	64.75	27.25	3
6	39	60	4	30	4	57	23.63	3
6	40	80	7	10	3	87.38	12.63	3
6	41	80	3	30	4	93	31.25	2
6	42	70	2	40	3	84.5	33.13	1
6	43	70	7	40	5	85.13	51	3
6	44	60	3	20	3	40	17	3
6	45	50	4	7	1	89.63	11.88	2
6	46	40	4	15	1	62.63	13.88	1
6	47	60	3	40	4	77.38	34.38	2
6	48	70	2	10	2	55.75	17.25	1
7	1	19	2	24	1	19	38	3
7	2	29	2	15	1	30.75	16.25	1
7	3	93	7	223	10	114	44.38	2
7	4	82	6	33	2	87.63	50.63	2
7	5	74	5	22	1	89.88	28.5	1
7	6	81	6	8		87	11	2
7	7	104	10	11	1	106.25	11.38	2
7	8	41	2	17	1	53.5	19.88	2
7	9	67	5	12	1	79	18.5	2
7	10	35		9	1	35.25	10.63	3
7	11	25	1	147	10	59.5	31.88	3
7	12	63	6	9		74.88	8.75	3
7	13	49		206	10	87.25	48.75	1
7	14	99	9	26	2	100.63	31.25	3
7	15	21	2	14	0	22.38	16.88	1
7	16	93		31	2	92.88	35.38	2
7	17	61		151	10	61.5	32	1
7	18	51	3	7	0	69.63	12.38	1
7	19	94	7	14	0	98	17.63	1
7	20	59	5	12	0	59.63	13	1
7	21	29	1	11	1	33.38	16	1
7	22	32	2	13	0	35.13	16.5	1
7	23	10	1	48	5	28.88	15.75	1
7	24					2	15.63	1
7	25	10	3	10	3	19.48	22	5
7	26	16	6	5	2	29.25	12	3
7	27	20	5	8	2	24.13	12.18	1
7	28	27	4	12	3	30.38	18.13	1
7	29	74	7	4	0	97.75	12.88	1
7	30	84	7	8	0	92.25	10.13	1
7	31	25	2	8	0	17.13	13.38	2
7	32	33	3	8	2	30.38	12.88	4
7	33	18	2	7	2	22.5	13.63	3
7	34	62	5	7	1	66.75	12.38	1
7	35	83	3	160	9	78.63	47.63	2
7	36	75	8	18	3	73.63	35.88	2
7	37	78	8	32	2	94	36.88	2
7	38	71	5	32	4	71.25	37.38	2
7	39	24	2	26	3	25	30.25	3
7	40	66	4	10	2	65.38	15.38	3
7	41	23	3	12	1	56.5	17.75	2
7	42	37	1	9	1	37.5	14	2
7	43	57	6	8	1	61.88	13.5	2
7	44	92	9	10	0	89.5	18.38	2
7	45	24	2	19	1	17.25	27.63	1
7	46	67	7	36	1	88	36.88	2
7	47	46	3	27	1	47.5	32.63	2
7	48	67	4	7	0	63.75	13.38	2
8	1	21	4	18	5	19.6	24.13	5
8	2	30	5	25	5	29.25	32.63	2
8	3	88	9	16	3	89.38	16.5	2
8	4	31		20	4	33	21	4
8	5	23	3	11	2	25.63	14.13	2
8	6	90	10	10	2	92.13	11.5	1
8	7	93	10	68	10	100.5	73.25	1
8	8	83	10	35	8	99.25	35.75	3
8	9	29	4	27	3	23.25	26.88	3
8	10	70	10	42	7	78.63	44.75	2
8	11	63	8	10	2	73.63	13.5	2
8	12	56	7	8	4	57.88	11.25	2
8	13	66	8	8	2	76.63	13.88	2
8	14	60	8	24	6	78.13	28.63	1
8	15	72	8	38	8	76.63	46.88	1
8	16	56	7	25	5	64.88	31.75	2
8	17	34	6	21	6	37.5	25	1
8	18	27	5	12	3	29.5	12.25	2
8	19	18	4	25	4	29	22.38	1
8	20	70	9	24	5	85.38	26.25	2
8	21	24	5	15	3	27.88	13.13	3
8	22	66	8	11	4	76	14	3
8	23	47	7	31	6	49.5	33.5	2
8	24	60	8	10	4	61.25	15	2
8	25	18	4	64	7	18.88	57.25	2
8	26	91	10	8	2	93.5	14.38	2
8	27	83	9	24	3	78.88	26.75	2
8	28	92	10	40	6	98.25	44.88	1
8	29	74	9	38	6	86.5	45	1
8	30	85	9	13	2	90	15	1
8	31	19	5	25	5	32.13	26.75	2
8	32	101	10	10	5	106.13	14.13	2
8	33	52	6	15	3	53.5	19.75	2
8	34	80	7	18	4	78.88	20.13	2
8	35	26	5	24	4	34.38	31.88	2
8	36	64	7	28	4	75.75	36.13	1
8	37	66	6	24	1	79.13	30.5	2
8	38	50	5	0	0	65.75	11.13	1
8	39	52	5	12	1	67.13	12.13	1
8	40	86	8	7	2	114.5	10.88	1
8	41	18	2	7	1	31	12.38	3
8	42	23	4	21	3	31.63	29.38	2
8	43	37	5	5	1	58.38	12.13	2
8	44	73	7	26	4	91	30.38	3
8	45	34	4	14	3	40	23.63	3
8	46	78	7	10	2	89.5	13.25	2
8	47	86	8	7	3	107.63	10.88	1
8	48	68	6	10	2	76.13	8.38	2
9	1	16	6	32	6	18.75	55.13	2
9	2	75	8	9	4	93.5	10.75	2
9	3	53	7	21	4	78.88	25.75	2
9	4	84	8	7	2	98.25	11.13	2
9	5	80	9	7	3	87.75	10.13	3
9	6	17	6	7	2	21.75	11.88	2
9	7	18	4	7	3	23.13	16.88	2
9	8	64	7	20	5	81	31.88	2
9	9	15	5	5	2	19.25	11.63	1
9	10	23	7	22	5	32.25	33.38	1
9	11	43	9	6	3	54.88	11.75	1
9	12	61	9	8	3	78	18.5	1
9	13	86	10	38	7	96.5	50.25	3
9	14	44	9	22	7	59.63	35.5	3
9	15	54	8	8	5	74.88	11.63	3
9	16	50	9	17	3	57	20.25	3
9	17	78	9	23	7	87.25	30.88	2
9	18	90	10	7	7	86.25	13.38	2
9	19	68	9	9	4	84.5	15.38	2
9	20	23	6	5	3	30.38	12	2
9	21	16	6	7	5	25.38	15.38	2
9	22	64	8	10	3	77.25	21.38	2
9	23	42	7	10	4	61.5	17.5	2
9	24	56	7	7	4	70.25	12.25	1
9	25	47	9	7	9	19.48	19.63	5
9	26	67	9	20	9	29.25	31	2
9	27	78	10	25	10	89.38	33.13	1
9	28	5	7	28	10	2.88	34.75	4
9	29	70	10	7	4	85.38	14.13	2
9	30	80		20		101	29.63	4
9	31	18		7	4	22.5	10.75	3
9	32	87	10	7	4	102.88	9.75	1
9	33	80	10	8	5	95.38	11.75	3
9	34	63	10	9	5	78.63	13.25	3
9	35	48	10	6	7	53.88	10.75	2
9	36	23		11	3	27.5	15.88	2
9	37	80	10	9	6	94	14.13	2
9	38	40	7	8	6	49	11.75	2
9	39	61	10	43	10	76	51.5	3
9	40	47		30	9	65.38	41.88	3
9	41	45	10	10	6	54	23.38	3
9	42	31	8	7	3	41.88	11.13	1
9	43	83	10	32	9	103.13	39.88	2
9	44	73	10	28	7	82.5	35.5	3
9	45	62		18	7	75.88	28.63	2
9	46	71	10	7	7	93.25	11	1
9	47	49	9	6	4	68.88	10.13	1
9	48	62	10	7	5	73.13	11.75	1
10	1	72	5	8	5	76.25	30.75	3
10	2	45	5	5	5	36.63	12.38	1
10	3	18	5	5	5	21.63	16.5	2
10	4	19	5	8	4	87.5	48.38	2
10	5	15	5	6	5
10	6		4	5	4	89.88	14.38	2
10	7	13	5	5	4	32.63	12.88	1
10	8	45	5	10	4	103.5	12.25	1
10	9		5	3	5	66.63	16.13	1
10	10	95	6	6	5	78.88	10	1
10	11	12	5	8	5	64	27.5	2
10	12	89	5	5	5	75.75	17.38	2
10	13	15	5	6	5	13.25	27.63	1
10	14	69	5	5	4	68.63	21.5	1
10	15	12	3	5	3	59.13	11.38	1
10	16	57	3	7	3	48.88	11.25	1
10	17	95	3	5	3	93	31.38	3
10	18		3	12	3	31.63	27.75	2
10	19		4	6	3	58.38	28.38	2
10	20	75	3	10	3	84.63	11.13	3
10	21	18	3	18	4	39.88	40.25	1
10	22	38	4	8	4	51.13	11.13	1
10	23	17	5	5	5
10	24		5	5	5	84.75	12	1
10	25	9	8	8	8	19.48	41.75	1
10	26	30	8	7	9	97.63	13.75	1
10	27		9	6	9	59	15.75	4
10	28	25	9	12	9	25.5	30.13	1
10	29	15	9	10	9	76.13	29	2
10	30	56	8		8	106.25	8.5	2
10	31	35	9	10	9	99.88	12.75	3
10	32	35	9	10	9	88.25	10.88	1
10	33	30	8	15	9	74.5	77	1
10	34	25	9	15	9	82.38	13	1
10	35	15	8	10	9	31.88	12.75	2
10	36		7		7	71.25	11.13	2
10	37	15	6	8	6	60.5	10.38	3
10	38	27	5	9	6	65.38	36.63	3
10	39	19	8	5	7	54	45.13	1
10	40	93	8	16	8	98	26.75	2
10	41	56	8		9	11.75	23.63	2
10	42	12	8	15	9	82.5	33.13	3
10	43	79	9	12	9	75.88	24.88	2
10	44	95	8	15	8	47.88	11.13	2
10	45	143	8	16	9	61.13	10.38	2
10	46	145	9	7	7	75.63	8.25	4
10	47	75	9	5	9	11.88	10.5	1
10	48	97	9	8	9	50.13	29.13	2
11	1	44	1	27	1	43.6	27.67	4
11	2	25	0	20	0	23.33	26.53	1
11	3	105	3	30	0	107.67	31.73	2
11	4	26	0	50	2	25.27	57.53	1
11	5	65	3	13	0	60.8	16.08	1
11	6	25	0	7	0	24.75	12.08	2
11	7	92	4	8	0	98.17	12.75	2
11	8	0	0	10	0	1	15.25	2
11	9	60	2	57	4	60.25	68.17	1
11	10	0	0	1	0	2.42	21.67	1
11	11	77	2	29	0	81	34.17	2
11	12	70	0	30	0	79.33	35.08	4
11	13	31	0	15	0	25.17	15.58	2
11	14	90	2	10	0	89.08	10.5	2
11	15	26	0	25	0	26.42	29.67	1
11	16	80	2	10	0	78.08	17	1
11	17	23	0	8	0	24.83	11.42	2
11	18	25	0	8	0	29.08	11.42	1
11	19	25	0	20	0	28	28.42	1
11	20	105	3	50	1	100.25	51	3
11	21	66	2	10	0	64.83	11.58	3
11	22	52	1	8	0	54.17	12.33	1
11	23	80	3	7	0	78	11.33	1
11	24	75	2	65	2	71.17	64.67	2
11	25	38	10	15	6	44	32.27	3
11	26	16	9	10	1	28.73	34	2
11	27	53	10	21	10	60.67	35.53	2
11	28	42	9	5	0	51.73	12.4	2
11	29	40	9	42	10	41.47	17.8	1
11	30	15	8	51	10	59.93	17.4	1
11	31	23	8	30	10	2.93	17.53	1
11	32	100	10	7	1	103.4	21.8	1
11	33	78	10	45	10	72.67	60.27	1
11	34	60	10	15	0	60.67	19.07	2
11	35	23	7	45	10	17.87	58.07	2
11	36	65	10	10	0	69.2	10.67	2
11	37	85	10	7	0	90.13	11.4	2
11	38	28	8	13	0	28.2	17.93	2
11	39	93	10	10	0	93	12.73	2
11	40	43	10	40	8	44.33	50.8	2
11	41	21	1	16	0	23.6	19.07	1
11	42	83	10	35	10	89.2	47.4	1
11	43	93	10	20	1	95.13	27.8	2
11	44	65	10	10	0	67.53	13.53	2
11	45	85	10	10	0	87.73	13.93	2
11	46	70	10	55	10	76.33	61.67	3
11	47	68	10	8	0	75.8	12.4	2
11	48	93	10	8	0	92.27	11.93	1
12	1	39	8	6	2	43.53	10.13	5
12	2	97	10	25	8	97.33	30.5	1
12	3	98	10	29	10	110.75	36.33	3
12	4	47	10	7	3	59.08	9.67	2
12	5	29	10	15	7	22.5	31.33	3
12	6	71	10	8	0	90.17	13.5	1
12	7	100	10	11	2	114.83	14.08	3
12	8	67	10	10	1	79	15.33	3
12	9	56	10	10	2	65.25	13.42	2
12	10	68	10	10	2	76.33	19	2
12	11	23	8	23	8	32.58	29.08	2
12	12	73	10	28	9	89	35.83	3
12	13	25		29	9	26.92	36.67	3
12	14	30	8	38	10	30.5	38.67	3
12	15	53	10	10	2	57.17	13.08	3
12	16	62	10	9	2	69.92	12.83	2
12	17	92	10	83	10	102.67	110.17	3
12	18	62	10	23	6	64.83	33.5	2
12	19	85	10	27	8	93.42	35	1
12	20	92	10	17	7	109.08	27.5	2
12	21	20	7	38	10	22.75	51.17	1
12	22	69	10	12	2	85.75	12.42	2
12	23	45	10	11	2	57.92	8.75	2
12	24	2	0	9	1	1.92	35.5	2
12	25	36	8	22	7	44.07	35.53	3
12	26	22	8	1	0	28.8	71.4	1
12	27	36	9	12	4	75.27	14.27	1
12	28	41	10	9	4	39	17.8	2
12	29	20	5	1	0	46.67	16.87	2
12	30	62	10	1	0	85.93	14.53	2
12	31	68	10	8	1	64.13	19.87	2
12	32	60	10	6	1	66.67	13.8	1
12	33	30	8	3	0	39.07	13.2	3
12	34	65	9	7	0	72.6	12.47	3
12	35	15	0	6	1	18.93	32.53	2
12	36	52	9	9	0	69.73	13.87	1
12	37	57	9	7	0	67.47	15.2	1
12	38	75	10	30	9	83.73	39.6	2
12	39	84	10	22	5	92.87	34.33	2
12	40	77	10	6	0	85.73	12.33	2
12	41	69	10	40	8	76.33	52.27	2
12	42	90	10	40	8	99.67	51.47	3
12	43	62	9	12	2	76.27	16.2	3
12	44	70	10	8	0	83.27	14.6	1
12	45	89	10			114.27	38.67	3
12	46	68	10	21	7	75.73	30.93	2
12	47	21	3	11	0	31.13	12.07	1
12	48	65	9	6	0	74.93	13.2	0
13	1	20	0	3	0	43.93	10.53	5
13	2	5	1	3	0	10	13.67	2
13	3	10	0	3	0	39.47	12.4	2
13	4	35	3	3	0	58.87	11.2	2
13	5	25	1	8	0	51.67	36.4	2
13	6	20	0	4	0	46.53	39.33	3
13	7	35	2	12	2	59.8	29.07	4
13	8	50	2	5	0	85	16.33	1
13	9	61	3	4	0	89.93	12	1
13	10	40	2	6	0	72.67	16.93	1
13	11	63	3	7	0	102.93	18.4	1
13	12	46	3	3	0	73.8	11.87	2
13	13	17	1	2	0	39.13	10.87	2
13	14	38	2	5	0	69.13	28.67	1
13	15	10	0	7	0	18.67	16.73	1
13	16	55	2	20	2	88	45.53	1
13	17	13	1	10	1	108.4	15.87	1
13	18	65	4	7	0	22.47	30.6	2
13	19	4	7	110	5	76.27	12.4	2
13	20	30	0	3	0	87.47	10.33	1
13	21	43	2	50	1	31.07	11.87	3
13	22	13	0	5	0	19	29.2	1
13	23	53	2	3	0	85.73	11	1
13	24	60	3	3	0	107	10.73	1
13	25	25	0	21	0	43.6	50.2	2
13	26	56	2	13	2	99.42	33.33	1
13	27	19	1	3	1	20.83	11.92	2
13	28	12	1	3	0	22.33	16.58	3
13	29	63	4	19	2	58.92	34.92	1
13	30	32	2	15	2	90.92	32.83	2
13	31	75	5	18	2	118.17	33.25	3
13	32	30	2	3	1	19.92	11.67	2
13	33	49	3	3	1	74.75	11	2
13	34	38	2	3	1	84.42	11.17	1
13	35	47	3	11	2	73.92	32.92	2
13	36	65	4	16	3	88.75	34.33	3
13	37	19	2	3	1	26.83	33.25	3
13	38	15	2	13	2	30.33	13.58	2
13	39	30	2	3	0	43.67	13.5	1
13	40	68	5	2	1	105.75	10.25	2
13	41	15	2	3	1	100.83	11.58	3
13	42	72	5	3	1	24	12	3
13	43	40	3	6	2	16.75	17.5	1
13	44	7	1	9	1	57.33	14.08	1
13	45	35	3	3	1	49.75	14	1
13	46	33	2	3	1	87.67	12	1
13	47	70	4	3	1	59	12	2
13	48	40	3	2	1	84.75	42.67	2
14	1	43	2	22	1	43.53	30.17	4
14	2	25	1	10	0	23.32	13.5	2
14	3	25	1	10	0	25.5	10.08	2
14	4	100	3	10	0	104.25	12.75	2
14	5	68	2	18	0	72.92	22.5	2
14	6	75	3	10	0	75.5	9.33	3
14	7	50	1	8	0	40.17	10.25	2
14	8	110	4	46	1	118.08	51.75	3
14	9	50	2	170	6	78.83	102.75	2
14	10	70	3	14	0	76.25	15.42	2
14	11	25	1	9	0	29.67	11.33	4
14	12	25	1	12	0	25.17	14.67	2
14	13	83	3	8	0	89	10.67	2
14	14	100	4	9	0	107.67	9.58	3
14	15	50	3	9	0	57	9.17	3
14	16	60	2	47	1	58.33	52.83	2
14	17	14	1	8	0	11.08	9.75	2
14	18	26	1	27	0	30	26.33	2
14	19	70	3	20	0	88.92	20.17	1
14	20	72	3	15	0	88.25	16.83	1
14	21	80	3	11	0	80.83	12.5	1
14	22	95	4	42	3	96.75	47.17	3
14	23	65	3	30	1	81.42	35	2
14	24	54	3	10	0	57.75	11.08	2
14	25	35	4	24	2	44	32.27	3
14	26	18	3	10	1	28.73	17.8	4
14	27	49	4	28	2	52.33	35.47	3
14	28	23	2	10	1	23.2	10.2	2
14	29	65	5	8	0	66.4	12.53	2
14	30	38	2	11	0	37.13	10.53	3
14	31	61	4	85	4	59.73	92.87	1
14	32	88	5	10	0	88.73	12.53	2
14	33	72	3	10	0	61.67	10.27	2
14	34	66	4	33	3	65.93	36.87	3
14	35	60	3	29	2	72.6	30.87	2
14	36	76	4	13	0	77.27	14	2
14	37	145	6	11	0	90.8	15.2	2
14	38	86	4	10	0	90.4	9.67	2
14	39	22	1	10	0	18.53	8.33	2
14	40	35	1	24	1	32.67	28.4	1
14	41	80	3	10	0	86.13	12.8	1
14	42	77	3	25	1	78.8	29.47	2
14	43	140	6	30	1	76.2	38.6	2
14	44	80	3	11	0	87.67	9.53	2
14	45	66	3	10	0	76.27	10.8	2
14	46	70	3	12	0	73.33	16.93	1
14	47	16	0	25	1	13.87	30.07	1
14	48	85	3	18	1	88	23.13	1
15	1	45	6	10	5	44	15.07	5
15	2	11	3	22	7	9.93	38.93	4
15	3	57	8	30	7	52.33	30.73	3
15	4	25	4	10	2	23.13	14.73	2
15	5	66	7	8	2	66.33	12.27	2
15	6	37	6	10	3	36.93	12.8	3
15	7	62	8	48	8	59.8	53.47	3
15	8	106	9	10	2	96.6	13.4	1
15	9	97	8	27	7	92.47	29.27	2
15	10	75	8	36	8	65.87	36.6	3
15	11	83	8	86	9	72.53	80.47	2
15	12	85	8	12	3	75.07	13.67	1
15	13	28	7	10	3	28.13	14.2	2
15	14	100	9	44	6	90.73	48.93	1
15	15	90	8	28	5	88.07	27.6	2
15	16	92	8	9	1	94.27	14.53	2
15	17	97	9	12	3	86.2	12.4	1
15	18	99	9	10	0	88.67	12	2
15	19	113	9	11		100.93	11.8	3
15	20	89	8	16	3	76.2	19.8	3
15	21	29		28	6	27.53	26.07	1
15	22	97	9	10	0	91.73	11	1
15	23	3	0	10	1	0.6	12.33	1
15	24	30	6	13	4	28.6	16.2	3
15	25	49	6	41	8	43.53	48.2	2
15	26	104	4	10	1	99.25	13.75	2
15	27	68	5	10	1	72.83	10.25	2
15	28		3	20	3	72.92	24.75	2
15	29	77	3	27	3	75.5	31	2
15	30	98	6	10	1	98.08	10.17	2
15	31	6	0	35	2	0.92	30.25	1
15	32	34	2	28	3	28.67	35.58	3
15	33	82	5	10	2	78.83	15.75	3
15	34	112	5	14	1	98	11.42	2
15	35	90	5	10	2	79.25	10.08	2
15	36	106	7	11	1	90.58	10.42	1
15	37	35	4	15	2	29.67	16.33	3
15	38	32	3	10	2	26.75	12	3
15	39	77	4	12	2	69.83	10.58	3
15	40	66	3	57	4	56.67	52.58	1
15	41	117	7	33	3	104.83	28.67	2
15	42	115	8	10	1	103.67	8.75	3
15	43	70	4	30	3	64.75	33.17	2
15	44	101	4	20	2	93.33	16.83	2
15	45	14	1	10	1	16.25	11.33	1
15	46	33	2	10	0	30.83	12.75	1
15	47	116	7	11	1	102.33	9.83	3
15	48	93	6	14	2	81.33	18.42	2
16	1	15	1	15	0	7.75	29.13	4
16	2	40	1	5	1	55.5	9.38	4
16	3	50	3	20	1	42.13	34.75	3
16	4	70	4	6	0	69.38	9.5	3
16	5	30		10	1	23.88	14.38	2
16	6	60	3	25	1	88.63	31.75	4
16	7	60	2	4	0	79.88	11.5	2
16	8	20	0	30	3	23.25	39	4
16	9	60	2	5	0	71.13	11.75	2
16	10	70	2	4	0	69.13	10.63	2
16	11	90	4	9	0	92	15.63	2
16	12	40	1	6	1	33	18.13	3
16	13	40	1	20	0	65.13	30.5	2
16	14	70	3	30	1	55	46.88	2
16	15	80	3	30	0	87.75	53	2
16	16	100	5	4	0	99.88	11.63	1
16	17	70	3	4	0	91.38	11.5	1
16	18	30		4	0	11.13	18.25	2
16	19	70	3	4	0	87.88	12.63	3
16	20	40	2	4	1	53	11.25	4
16	21	40	2	4	0	63.25	3.63	1
16	22	60	3	20	1	68.5	37.13	2
16	23	40	2	40	2	37.25	79	3
16	24	70	2	20	1	87.13	34.25	2
16	25	20	3	5	0	42	16.63	5
16	26	10	1	2	0	21.38	15	2
16	27	40	2	10	0	55.5	26.13	2
16	28	60	4	4	0	75.38	17.63	2
16	29	40	2	2	0	98.38	39.13	1
16	30	70	4	3	0	100.75	10.5	1
16	31	90	4	15	1	106.88	51.38	1
16	32	90	4	3	0	99.13	7.5	1
16	33	60	2	2	0	100.63	10.88	1
16	34	70	4	5	0	68.63	16.13	1
16	35	50	2	40	2	33.5	58	2
16	36	40	1	4	0	73.25	17.88	2
16	37	30	1	10	0	10.13	31.25	2
16	38	90	3	10	0	73.63	16	2
16	39	40	1	40	1	40.5	60.25	2
16	40	80	3	4	0	80.5	10.5	2
16	41	110	5	80	6	100.75	116.5	1
16	42	60	3	30	0	76.63	35.63	1
16	43	50	2	4	0	62.88	12.75	1
16	44	70	1	6	0	70.5	14.63	2
16	45	60	2	4	0	56.38	16.13	2
16	46	40	1	4	0	25.38	11.75	2
16	47	70	3	10	1	72.75	16.38	1
16	48	2	0	4	0	4.38	12.25	1
17	1	39	8	28	5	42	34.75	3
17	2	23		8	0	24.5	17.13	3
17	3	12	0	5	0	12	35.88	3
17	4	23	7	10	0	27	16.5	2
17	5	40	9	17	3	74.25	32.13	1
17	6	5	0	4	0	15.38	11.75	2
17	7	5		15	3	0.63	61.13	3
17	8	58	8	5	0	82.13	16.75	3
17	9	75	9	10	1	97.75	31.38	2
17	10	17	6	20	3	21.38	23.88	2
17	11	55	6	34	3	67.88	48.88	1
17	12	73	9	19	2	84.5	32.5	1
17	13	54	7		4	65.5	45.88	3
17	14	11		5	0	17.5	11	3
17	15	20	5	7	1	39.25	10.13	2
17	16	35	5	5	0	73.25	16.38	2
17	17	45	7	4	1	53.63	15.25	2
17	18	60	6	22	4	59	30.25	1
17	19	48	6	24	3	57	32.75	1
17	20	53	8	8	0	73.25	9	1
17	21	79	8	7	7	76.63	12.13	3
17	22	63	7	6	3	78.63	14.5	2
17	23	50	6	20	5	65.88	39	4
17	24	50	7	9	4	59.13	16.25	3
17	25	7	2	40	3	7.75	52.13	1
17	26	39	6	10	0	52	20.25	1
17	27	39	5	5	0	48.13	14.38	1
17	28	24	5	5	0	27.63	14.25	1
17	29	50	6	5	2	63.63	10.13	1
17	30	62	6	21	5	84.38	32.88	1
17	31	45	5	33	2	57.38	51.25	1
17	32	56	6	10	0	84.5	21.75	1
17	33	55	7	24	2	85.13	34.38	2
17	34	69	7	10	1	92	17.63	2
17	35	20	4	6	0	32.88	16	3
17	36	23	4	10	0	20.13	14.38	3
17	37	52	6	5	0	30.5	15.13	1
17	38	63	8	7	0	65.63	12	1
17	39	15	3	20	2	87.5	11.88	3
17	40	52	4	6	0	32.13	32.5	1
17	41	58	6	10	0	109.5	12.75	1
17	42	63	5	6	2	90.75	21.88	2
17	43	37	3	37	5	87.88	9.75	3
17	44	55	6	7	3	53	60.38	2
17	45	48	5	33	2	78.25	17.38	1
17	46	55	4	10	3	75.38	15.88	3
17	47	15	3	5	0	21.25	11.5	1
17	48	20	4	6	0	32.88	10.38	2
18	1	11	3	20	5	7.75	36.25	4
18	2	40	6	5	1	55.5	13	4
18	3	30	4	29	5	42	38	3
18	4	51	8	22	5	69.38	31.5	1
18	5	50	7	8	1	96.5	10.13	1
18	6	24		7	1	35.88	11.88	4
18	7	33	5	5	1	65.5	15.38	2
18	8	70	9	35	5	86.63	31.25	2
18	9	42	5	18	3	77.13	32.75	2
18	10	63	8	12	4	79.38	17.88	1
18	11	71	8	10	2	97.25	12.13	1
18	12	50	6	11	1	65.38	17.75	1
18	13	57	7	13	1	74.88	22.5	1
18	14	71	9	5	0	87.25	14.13	2
18	15	62	7	31	5	71.75	48.88	2
18	16	55	6	10	4	106.63	13.63	1
18	17	76	8	61	8	199.88	80.63	1
18	18	46	6	22	5	61.13	33.13	1
18	19	51	6	27	4	73	49.5	2
18	20	52	6	20	3	75.38	32.88	1
18	21	61	8	38	6	87.13	61.5	1
18	22	30	4	8	2	25.63	10.63	1
18	23	5	0	5	0	2.63	10	1
18	24	5	0	5	0	2.25	7.88	1
18	25	32	9	9	8	42	19.13	5
18	26	18	7	7	6	21.38	11.38	2
18	27	41	10	21		55.5	29.13	2
18	28	55	10	11	8	75.25	18.88	2
18	29	50	10	9	8	98.25	13.63	4
18	30	18	8	44	10	22.13	58.88	1
18	31	67	10	18		82.25	27	1
18	32	18		7	5	24.75	10.63	2
18	33	72	10	8	4	85.5	12.13	2
18	34	58	9	8	4	67.88	10.75	2
18	35	59	9	7	6	69	13.5	2
18	36	64	10	23	8	80.75	34.63	3
18	37	13	6	8	4	17.75	17.75	3
18	38	54	8	11	3	77.75	16.5	2
18	39	63	10	6	1	80.63	10.5	2
18	40	45	7	10	2	53.75	13.88	2
18	41	43	6	11	4	58.5	16.5	2
18	42	45	6	7	1	62.88	14.25	2
18	43	81	10	40	10	100.63	53.13	2
18	44	81	10	13	5	98.5	20.25	1
18	45	54	9	9	4	77.38	14.5	4
18	46	45	8	23	5	59.38	33.38	2
18	47	30	5	56	10	60.63	69.25	1
18	48	45	7	8	3	52.13	11.13	1
19	1	15	2	20	3	7.75	31.38	4
19	2	4	5	10	2	55.5	14.5	4
19	3	40	5	22	3	42	40.63	3
19	4	60	5	10	1	69.25	11.75	3
19	5	50	5	10	0	67.63	17.25	1
19	6	90	7	15	0	102.5	20.13	1
19	7	90	8	90	8	91.75	92	1
19	8	60	5	20	5	74.38	31.88	1
19	9	53	6	5	0	76	12.5	1
19	10	50	7	10	0	92	17.38	3
19	11	30	3	25	4	65.88	33.38	2
19	12	40	4	15	3	55	31.75	3
19	13	20	2	30	4	26	52	1
19	14	20	3	5	0	38.88	11.63	3
19	15	60	8	10	0	95	15.38	1
19	16	60	5	5	0	92.75	11.63	1
19	17	80	8	5	0	98.63	8.88	0
19	18	20		10	0	24	17.5	3
19	19	40	5	30	5	57	55.75	3
19	20	60	6	10	0	66.5	15.63	2
19	21	20	1	30	2	13.13	38.5	2
19	22	20	3	5	0	28.25	9.88	3
19	23	30	3	40	6	52.13	68.75	3
19	24	80	8	8	0	106.75	10	1
19	25	40	5	20	5	42	33.75	3
19	26	20	2	20	1	24.5	31.5	2
19	27	40	5	17	5	62.75	36.5	2
19	28	40	6	10	2	74.25	10.5	2
19	29	40	6	5	2	68.25	9.88	4
19	30	20	3	30	6	22.13	37	3
19	31	60	6	5	2	82	13.25	3
19	32	65	5	25	2	97.75	47	1
19	33	50	2	10	0	78.13	16.5	1
19	34	20	3	5	2	22.5	11.88	2
19	35	18	0	17		23.38	30.88	2
19	36	40	1	10	3	69	10	2
19	37	10	7
19	38	18	6	10	4	80.75	32.63	3
19	39	14	2	23	6	17.75	37	2
19	40	50	2	10	0	70.5	13	1
19	41	40	5	10	2	91.38	14	2
19	42	50	5	13	0	73.63	20	2
19	43	15	4	7	0	40.5	17.63	2
19	44	30	2	8	0	72.5	13.25	1
19	45	76	1	5	0	97	9.75	1
19	46	50	2	10	3	88.13	11.13	2
19	47	30	7	15	6	51.13	27.63	2
19	48	20	2	10	2	43.25	12.38	4
20	1	30	3	19	3	42	32.38	3
20	2	20	3	17	0	24.5	29.25	2
20	3	45	8	6	0	62.75	10.38	2
20	4	25	5	5	0	31.63	11.88	1
20	5	66	9	36	3	88.38	53.38	4
20	6	16	1	5	3	22	12.75	4
20	7	53	5	28	1	54	31.5	3
20	8	78	9	7	1	97.63	10.63	3
20	9	72	9	9	0	98.5	18.38	1
20	10	70	9	20	2	87.88	29.63	2
20	11	52	7	11	0	70.38	18.5	1
20	12	19	3	7	3	35.25	12.5	4
20	13	22	1	8	0	29.13	14.88	1
20	14	55	5	24	1	74.13	34.63	2
20	15	55	8	6	0	80.5	10.25	2
20	16	70	7	11	0	93.38	18.25	1
20	17	43	5	15	0	57	21.13	1
20	18	50	6	11	0	72.88	18.75	1
20	19	66	7	7	0	89	13	2
20	20	45	4	7	0	58.5	14.38	2
20	21	52	5	26	3	65.88	39.25	4
20	22	45	5	20	1	59.13	32.13	2
20	23	43	4	7	0	60.63	13.88	2
20	24	50	6	7	0	71	11.38	2
20	25	9	1	7	2	7.63	15.13	5
20	26	33	3	23	2	47	34.38	4
20	27	30	3	7	0	42.13	12.75	4
20	28	42	4	7	1	54	12.75	1
20	29	44	4	7	2	65.38	12	2
20	30	70	10	22	5	88.63	33.63	4
20	31	44	4	7	2	65.5	17.38	2
20	32	65	9	7	3	86.63	11.88	4
20	33	43	6	23	4	71	34.5	2
20	34	55	8	7	0	70.38	12.63	1
20	35	42	5	7	0	52.5	15.38	1
20	36	53	7	15	0	74.63	18.88	1
20	37	52	7	7	0	66.75	12.38	1
20	38	46	6	18	2	60.75	28.88	2
20	39	62	8	7	0	87.63	14.25	2
20	40	79	9	7	0	101.88	13.25	1
20	41	20	2	7	0	28.38	12.75	1
20	42	65	8	7	2	86.63	13.63	1
20	43	63	8	25	3	66.5	35.75	3
20	44	42	4	36	4	57	56.63	3
20	45	48	4	15	2	66.5	18.13	2
20	46	56	7	7	1	68.13	11.5	2
20	47	19	2	7	2	32.13	15	3
20	48	73	8	15	1	37.63	19	2
21	1	40	0	5	0	59	13.07	5
21	2	60	3	5	0	59.88	11.88	3
21	3	50	2	5	0	62.38	13.25	0
21	4	70	2	10	0	69.25	13.56	4
21	5	50	2	20	1	62.22	44.67	1
21	6	60	1	10	0	83.22	23.11	1
21	7	60	2	80	3	89.44	123.22	3
21	8	70	2	25	1	92.78	29.33	3
21	9	40	1	10	0	25.22	12.89	2
21	10	30	1	5	0	18.89	11.44	2
21	11	30	1	5	0	15.11	10.78	2
21	12	60	2	3	0	67.78	11	2
21	13	60	2	30	1	81.45	32.11	3
21	14	30	0	5	0	22.56	11.67	2
21	15	30	0	40	1	15.56	53.33	1
21	16	30	1	30	1	31	33.89	3
21	17	60	2	10	1	70.56	21	3
21	18	70	2	40	1	102.67	53.78	4
21	19	40	0	70	2	51.45	115.11	2
21	20	60	1	30	1	79.67	27.22	3
21	21	40	1	8	0	67.78	11.67	2
21	22	60	2	8	0	58.11	14.78	2
21	23	50	2	30	1	77.89	30.56	4
21	24	30	1	10	0	27.89	12.11	3
21	25	10	1	20	1	18	29.47	3
21	26	60	2	10	0	83.47	11.67	2
21	27	20	1	40	1	21.53	36.13	3
21	28	15	0	40	2	54.33	48	3
21	29	40	1	3	0	49.47	12.67	3
21	30	45	1	5	0	49.07	11.53	2
21	31	40	2	2	0	59.07	11.07	2
21	32	50	1	3	0	83.13	11.93	2
21	33	60	2	3	0	64.47	13.27	2
21	34	15	0	7	0	16.07	16.67	1
21	35	60	1	30	1	70.13	47.4	3
21	36	50	1	3	0	59.73	10.93	3
21	37	60	2	3	0	101.87	9.87	2
21	38	60	1	3	0	77.8	8.73	2
21	39	10	0	3	0	23.07	11.47	3
21	40	20	0	15	0	19.4	29.27	2
21	41	60	1	25	1	92.47	52.27	2
21	42	70	1	7	0	92.47	16.27	2
21	43	60	2	4	0	63.33	14.4	1
21	44	70	1	15	1	87	32.8	5
21	45	40	1	20	0	54.2	29.53	1
21	46	60	1	30	0	66.13	48.73	1
21	47	50	0	3	0	61.33	12.87	1
21	48	40	0	3	0	30.8	12.4	2
22	1	15	2	5	0	18	17.07	5
22	2	24	1	8	1	28.73	11.93	3
22	3	30	1	28	1	62.13	59.27	3
22	4	48	2	37	2	54.27	51.47	3
22	5	44	2	22	2	49.4	39.33	1
22	6	65	4	10	0	75.87	14.87	2
22	7	65	4	25	0	75.93	34.8	2
22	8	73	4	23	2	82.67	33.33	3
22	9	11	1	28	3	32.07	31.47	1
22	10	72	2	40	2	89.2	50.6	1
22	11	63	3	14	0	70.07	19	1
22	12	93	4	8	0	108.47	13.2	2
22	13	43	2	20	2	48.07	23.53	2
22	14	92	4	6	0	106	14.6	3
22	15	15	0	10	0	19.93	15.4	1
22	16	89	5	10	1	101.07	11.27	2
22	17	85	4	10	0	92.4	16.8	2
22	18	22	1	26	2	33.33	31.2	3
22	19	71	3	23	1	75.33	30.93	4
22	20	26	1	30	3	29.33	31.2	2
22	21	32	2	7	0	35.8	9.53	2
22	22	67	3	9	0	71.07	9.27	3
22	23	42	2	14	1	86.53	20.27	2
22	24	67	3	5	0	74.27	11.53	2
22	25	50	2	22	2	58.98	37.67	3
22	26	71	2	7	0	80.33	10.89	1
22	27	52	3	9	0	61.11	14.56	1
22	28	61	3	11	0	71.22	16.44	1
22	29	58	3	32	2	67.89	36.44	2
22	30	64	3	14	0	72.11	18.78	2
22	31	17	0	46	4	20.89	80	3
22	32	6	0	48	5	6.89	72.22	2
22	33	75	5	9	0	88.22	13.56	2
22	34	81	6	10	1	93.22	12.22	2
22	35	61	5	20	1	64	31.89	2
22	36	64	4	40	3	81.45	48.56	1
22	37	65	4	10	0	80.45	15.78	2
22	38	51	3	9	0	60.11	12.56	3
22	39	60	4	13	0	70.56	22.33	3
22	40	100	6	8	0	102.56	14.67	2
22	41	31	2	8	0	43.78	14	1
22	42	21	1	4	0	24.78	11.56	3
22	43	17	0	6	0	20.78	13.56	3
22	44	11	0	12	0	32.89	18.67	2
22	45	67	2	27	2	83.56	33.33	1
22	46	66	3	13	0	72.78	23.67	1
22	47	69	2	40	3	86.78	53.56	4
22	48	19	0	23	2	27.89	29.11	2
23	1	56	5	15	3	58.98	17.22	5
23	2	81	6	11	3	59.88	12.78	3
23	3	79	6	15	3	62.25	11.89	0
23	4	4	2	17	3
23	5	54	4	15	3	69.25	14.56	4
23	6	70	6	9	2	62.11	12	4
23	7	44	4	10	1	39.22	13.89	2
23	8	63	6	20	2	72	15.78	2
23	9	33	3	8	2	20.89	13.78	4
23	10	30	3	31	4	23.44	39.33	2
23	11	110	8	41	4	103.44	45.67	1
23	12	103	8	40	5	101.33	46.44	1
23	13	71	7	30	3	69.78	29.56	2
23	14	96	8	10	3	85.56	10.56	2
23	15	105	8	10	2	100.56	12	2
23	16	104	9	10	3	85.56	12.44	3
23	17	93	9	10	2	72.67	11.78	1
23	18	83	7	8	0	76	11.56	1
23	19	79	7	11	2	70	10.56	4
23	20	50	5	58	5	51.45	52.11	2
23	21	95	8	15	2	94.67	14.67	1
23	22	29	3	33	3	23.56	29	2
23	23	83	8	30	4	72.45	28.33	1
23	24	79	7	12	1	70	17.67	1
23	25	19	4	5	3	18	18.33	5
23	26	30	7	4	3	31.87	13.53	1
23	27	94	9	12	4	96.53	16.67	1
23	28	25	5	12	4	36.8	15.33	3
23	29	52	6	41	7	54.33	52.47	3
23	30	44	5	9	4	49.4	17.47	3
23	31	51	5	30	6	49.07	35.87	1
23	32	85	8	9	3	83.6	11.27	1
23	33	103	9	8	3	100.33	13.93	1
23	34	95	8	9	4	94	11.53	3
23	35	28	3	8	4	20	10.07	2
23	36	24	5	22	5	24.8	31.2	3
23	37	82	7	8	4	59.67	16.67	3
23	38	72	6	7	3	101.93	14.67	2
23	39	40	5	36	4	23.07	32.4	2
23	40	104	9	26	4	101.87	30.2	1
23	41	107	9	11	3	103.67	13.93	1
23	42	99	8	27	5	96.53	31.47	3
23	43	87	7	43	5	75.33	47.6	1
23	44	91	9	17	1	79.27	22.2	1
23	45	69	6	27	4	71.67	29.53	3
23	46	94	8	13	3	86.47	21.6	2
23	47	85	8	49	6	74.2	51.67	2
23	48	41	5	15	1	38.6	21	2
24	1	18	8	50	9	18	13.53	1
24	2	105	10	5	1	107.93	11.67	1
24	3	20	5	3	1	42	13.13	3
24	4	60	8	7	2	62.93	19.73	3
24	5	16	5	5	0	22.73	13.2	4
24	6	20	3	30	4	29.4	29.33	2
24	7	52	9	10	0	62.07	22.8	1
24	8	75	10	5	0	93.93	14.53	2
24	9	65	9	5	0	66.4	12	2
24	10	90	10	40	8	82.6	49.73	2
24	11	60	10	20	4	94.93	30.27	3
24	12	90	10	7	1	100.8	12.47	3
24	13	50	8	30	4	59.67	30.13	1
24	14	20	4	30	3	27.47	35.13	2
24	15	50	7	25	2	48.13	39	1
24	16	103	10	35	2	101.8	49.67	2
24	17	80	9	3	0	92.33	15.27	2
24	18	103	10	8	0	105.87	12.53	1
24	19	90	9	7	0	95.53	11.73	3
24	20	67	8	23	2	75.33	27.6	4
24	21	30	2	10	0	29.33	11.13	5
24	22	40	5	7	0	53.47	13.2	2
24	23	80	8	7	0	87.6	12.2	2
24	24	70	8	6	0	81.6	10.07	2
24	25	40	6	35	7	72.6	50.67	2
24	26	30	6	7	0	42.87	10.47	1
24	27	45	3	20	2	58.98	36.78	3
24	28	20	2	20	0	27.78	27.56	3
24	29	35	2	10	0	62.38	13.78	0
24	30	43	3	10	0	69.22	16.44	4
24	31	30	2	20	1	62	29.89	2
24	32	70	4	5	0	85.44	9.78	2
24	33	20	2	25	1	65.78	33	4
24	34	88	5	6	0	111.67	13.67	3
24	35	90	4	40	1	92.56	53.89	2
24	36	62	2	33	0	93.22	49.67	1
24	37	45		7	0	68.56	10.89	1
24	38	30	0	7	0	28.56	13	3
24	39	20	0	15	0	22.56	28.67	1
24	40	80	3	40	0	87.45	56.33	3
24	41	60	1	40	0	70.56	67.89	3
24	42	30	0	5	0	24	10.56	2
24	43	20	0	20	0	29.11	27.89	4
24	44	40	0	7	0	51.33	10.89	4
24	45	90	3	10	0	109.22	20	2
24	46	65	2	7	0	83.22	11.78	2
24	47	25	0	10	0	39.78	13.78	2
24	48	35	2	15	0	58	27.22	1
24	49	85	2	5	0	90.89	13.11	4
24	50	15	0	20	0	27.89	31.78	2
25	1	10	6	3	5	17.93	36.53	3
25	2	4	4	1	2	15.53	11.2	1
25	3	8	6	3	3	28.73	11.87	3
25	4	30	9	4	3	62.07	12.53	3
25	5	17	8	13	6	62.87	19	3
25	6	75	10	3	2	96.73	11.47	2
25	7	38	8	78	10	75.73	95.4	2
25	8	74	10	14	6	83.07	32.93	1
25	9	20	6	13	5	29.13	29.33	2
25	10	69	9	27	8	94.87	46.13	1
25	11	61	9	9	4	100.47	20.27	1
25	12	57	8	3	1	95.93	15	1
25	13			7	3	66.67	17.4	1
25	14	72	9	35	6	88.33	53.27	2
25	15	75	9	7	3	101.8	11.33	2
25	16	74	10	4	1	99.8	11.07	1
25	17	48	7	6	3	90.8	10.93	1
25	18	54	8	8	3	87.47	18	1
25	19	10	3	4	3	24.67	11.4	4
25	20	18	4	10	5	29.33	33.73	2
25	21	19	3	5	3	35.8	12.53	2
25	22	44	7	16	5	71	30.33	1
25	23
25	24
25	25	31	6	25	5	58.98	54.56	1
25	26	59	8	10	2	90.11	18.89	1
25	27	47	7	21	4	75	36.67	4
25	28	49	7	9	3	62.11	14.89	4
25	29	54	8	16	4	79.67	30	2
25	30	37	7	19	4	65.78	33	4
25	31	52	8	5	2	152.22	11.78	2
25	32	17	4	7	2	20.67	9.56	2
25	33	17	4	11	3	22.56	10.11	3
25	34	20	5	16	3	25.11	29	1
25	35	66	9	11	3	101.67	21.33	1
25	36	69	9	18	4	105.45	34	2
25	37	59	9	4	1	100.56	13.11	2
25	38	22	4	6	2	40.45	10.89	1
25	39	46	7	6	2	78.78	11.56	1
25	40	57	8	5	2	78.67	12.45	3
25	41	12	3	4	1	24	10.89	2
25	42	19	4	16	4	29	30.89	4
25	43	32	5	5	2	51.45	15.33	4
25	44	40	6	5	2	63.67	9.89	2
25	45	41	5	28	4	79.67	46.22	2
25	46	46	7	8	3	72.33	17	2
25	47	49	7	3	1	72.22	10.44	1
25	48	55	8	5	2	91.33	11.56	1
26	1	70	5	3	3	22.13	50.88	1
26	2	90	4	5	3	50.25	17.13	1
26	3	10	4	10	5	72.88	11.13	2
26	4	36	3	2	2	78.63	17.25	2
26	5	8	2	4	1	19.63	11.75	1
26	6	30	3	30	4	23.75	29.38	1
26	7	80	6	5	2	77.88	12	1
26	8	50	3	10	2	76.75	18	2
26	9	70	5	5	4	88.75	13	2
26	10	31	6	10	4	42.25	13.63	2
26	11	50	6	7	3	90.63	18.25	1
26	12	2	2	3	2	2.38	8.88	1
26	13	38	5	2	3	66.88	11.5	1
26	14	84	6	16	3	125.25	37.88	3
26	15	60	7	30	5	89.75	39.5	2
26	16	40	6	2	2	57.88	12.25	2
26	17	48	6	3	2	48.25	13	3
26	18	40	6	2	1	103	13.5	3
26	19	38	6	6	1	59.25	16.38	1
26	20	60	6	15	5	80	33.63	2
26	21	5	3	3	1	10.38	12.88	2
26	22	10	4	5	0	20.5	12.75	1
26	23	15	3	30	3	23.38	32.88	2
26	24	58	5	10	2	83.88	21.88	2
26	25	7	2	4	2	21.88	27.38	5
26	26	30	3	3	3	49.63	14.13	2
26	27	64	5	28	5	101.13	60.13	3
26	28	30	4	3	3	57.5	9.88	2
26	29	50	4	15	3	82.38	31.25	3
26	30	66	4	8	1	90.2	11.4	4
26	31	30	3	10	3	14.6	15.4	2
26	32	54	4	2	2	71.8	7.6	2
26	33	28	3	10	3	46.2	20.2	3
26	34	40	5	25	4	67.4	48.4	3
26	35	30	4	20	2	46.8	29.6	4
26	36	32	5	2	1	58.6	10.4	2
26	37	48	3	7	1	67.8	16.8	1
26	38	9	2	16	3	22.6	33.2	2
26	39	60	4	6	0	111.6	15.8	2
26	40	14	1	3	0	24.4	14	2
26	41	12	2	17	3	25.4	28.2	3
26	42	48	3	28	3	62	36	3
26	43	53	4	2	1	72.6	13.2	1
26	44	60	5	2	1	104.6	11.6	1
26	45	10	1	15	2	31.6	33.4	2
26	46	70	4	10	3	96.6	12.2	2
26	47	7	2	3	1	12.8	13.8	1
26	48	18	2	18	5	24.2	30	4
27	1	25	0	22	0	21.85	50.8	3
27	2	80		8		85.8	9	1
27	3	14	0	5	0	28	9.4	2
27	4	12	0	3	0	22.4	14.6	2
27	5	48	0	3	0	61.8	10.8	2
27	6	50	0	2	0	69.4	12.6	3
27	7	60	2	15	0	90	36.4	4
27	8	33		4		58.4	11	3
27	9
27	10	60	1	2	0	51.4	62.8	3
27	11	45	1	3	0	65.8	10.6	4
27	12	38	0	3	0	19.8	13	3
27	13	25	0	3	0	87.4	25.8	2
27	14	35	0	13	0	88.6	53	1
27	15	45	0	20	0	84.8	6.6	1
27	16	45	1	2	0	70.8	9.8	3
27	17	30	0	2	0	61.8	16.6	3
27	18	40	2	3	0	26.2	19.8	4
27	19	30	1	3	0
27	20	28	0	6	0	80.6	29.6	2
27	21	30	0	13	0	114.4	11.4	2
27	22					96.4	15.8	2
27	23	75	3	5	0
27	24	60	2	6	0	105.4	10	4
27	25	7		8
27	26	8		8		22.25	11.88	5
27	27	1				33.5	18.25	4
27	28	38	0	12	0	78.63	36.88	2
27	29	50		3	0	102.75	17.63	2
27	30	26	1	24	1	35.13	29.38	1
27	31	40	2	3	0	75.13	11	1
27	32					38.75	52.5	2
27	33	18	0	3	0	32.5	16.63	2
27	34	40	1	2	0	66.5	13.13	2
27	35	38	1	2	0	52.75	10.38	2
27	36	50	1	4	0	82.25	15.75	2
27	37	22	1	2	0	2.5	5.13	2
27	38	55	1	2	0	107.5	11	1
27	39		2
27	40	60		2	0	108.38	14.88	1
27	41	35	0	2	0	23.13	10.63	3
27	42	33	1	2	0	68.38	30.63	2
27	43	45	1	20		92.13	66.88	3
27	44	50	1	10	0	103	27.75	3
27	45	34	1	2	0	14.25	12.25	1
27	46	39	1	3	0	50.88	8.5	1
27	47	65	2	20	0	86.88	50.75	1
27	48	70	2	20	0	112.13	88.88	2
28	1	30	0	10	0	21.85	31.4	5
28	2	63	0	74	4	49.63	70.4	1
28	3	135	7	8	0	187.2	10.8	2
28	4	66	3	7	0	54.1	11.2	1
28	5	130	7	8	0	109.2	10.2	1
28	6	45	4	59	5	37.6	56.6	2
28	7	81	5	30	0	71.8	30.4	2
28	8	88	5	8	0	74.4	12	1
28	9	93	4	9	0	81	12.2	3
28	10	53	4	37	0	46.8	33.8	4
28	11	25	0	10	0	19.8	15.4	3
28	12	100	5	10	0	87.4	12.6	3
28	13	110	7	10	0	92	13	2
28	14	140	8	15	0	111.6	20.2	2
28	15	30	1	40	0	24.4	39	2
28	16	85	8	10	0	75	13.6	2
28	17	47	1	64	6	36.8	58.4	4
28	18	88	4	63	4	80.6	52.2	1
28	19	130	8	65	3	118.4	53.8	1
28	20	100	8	9	0	83	7.8	1
28	21	75	1	38	0	80.8	33.2	2
28	22	46	0	58	0	36.8	6.8	1
28	23	120	7	20	0	93.2	21.6	1
28	24	96	7	26	0	6.6	8.8	0
28	25	17	0	21	0	22.25	16.25	5
28	26	40	0	16	0	34.13	37.88	3
28	27	77	3	5	0	84.63	13.75	2
28	28	72	3	6	0	70.75	14.88	1
28	29	85	4	9	0	89.38	11.5	2
28	30	86	4	7	0	87.75	13.25	3
28	31	71	3	6	0	75.63	11.5	1
28	32	71	4	10	0	77.75	10.5	2
28	33	85	4	9	0	91.38	13.38	1
28	34	100	5	24	0	97	28.13	2
28	35	77	4	29	0	82.25	34.25	1
28	36	118	5	9	0	106.38	13.38	2
28	37	80	4	60	3	80.63	74.75	2
28	38	97	4	12	0	89.5	17.25	2
28	39	84	5	9	0	74.5	10.5	2
28	40	105	5	18	0	92.13	19.75	2
28	41	84	5	8	0	82.38	7	1
28	42	75	6	8	0	63.5	13.38	3
28	43	47	2	8	0	47.5	13.38	3
28	44	96	4	29	0	89	33.88	1
28	45	117	6	28	0	107.5	36	2
28	46	26	2	58	0	25.5	12.5	2
28	47	22	0	10	0	23	15.75	2
28	48	4	9	158	0	47.75	21.5	1
29	1	20	2	5	2	22.25	10.38	5
29	2	20	2	9	2	33.5	28.88	4
29	3	26	2	8	2	34.13	12.63	4
29	4	27	2	9	2	31.38	13.63	1
29	5	120	4	12	2	90.5	18.75	1
29	6	61	4	10	2	77.13	10.25	2
29	7	90	4	32	3	102.75	32.5	1
29	8	66	3	13	2	87.38	16.63	1
29	9	21	2	12	2	23.88	17.63	2
29	10	84	3	8	2	88.75	10.63	2
29	11	35	3	17	2	42.25	28.5	1
29	12	73	3	26	3	90.25	37.75	2
29	13	80	4	12	2	86.63	16.25	2
29	14	50	3	40	3	45	58.13	2
29	15	24	2	24	2	44.25	34.25	3
29	16	85	4	41	2	89.63	46.75	2
29	17	55	3	22	2	57.88	30.38	2
29	18	22	2	12	2	23.88	17	1
29	19	60	3	65	5	72.63	73.63	1
29	20	27	2	12	2	21.5	13.13	1
29	21	15	2	22	2	16.63	30	3
29	22	22	2	23	2	47.5	31.13	2
29	23	31	2	13	2	27.25	22	2
29	24	96	4	10	2	101.75	12.63	1
29	25	21	2	65	4	21.85	63.6	2
29	26	74	3	12	3	89.6	15.2	2
29	27	48	3	28	3	56.8	34.2	2
29	28	45	3	14	1	50.4	16.2	1
29	29	96	4	21	2	104.6	28.4	1
29	30	31	2	55	4	21	61.4	4
29	31	57	3	47	4	58.4	46.8	1
29	32	44	2	35	3	47.6	39.6	3
29	33	65	3	53	3	67.4	46.6	3
29	34	46	2	24	3	46.8	30	4
29	35	9	1	10		19.6	8.4	3
29	36	17	2	190	7	87.4	30.4	2
29	37	77	4	32	2	88.6	37	3
29	38	1	2	11	2	25	14	2
29	39	71	3	12	2	85.6	16.2	2
29	40	75	4	10	2	75	9.6	2
29	41	71	4	66	4	36.6	57.4	4
29	42	76	4	12	2	80.6	12.6	3
29	43	70	4	46	2	67	46.6	3
29	44	28	2	11	1	28	12.6	3
29	45	20	2	11	0	19.6	18	1
29	46	89	2	46	2	92	51.4	4
29	47	62	3	11	0	61.6	10.4	1
29	48	44	2	12	0	45.6	13.6	1
30	1	25	2	40	3	21.88	60.8	2
30	2	65	3	7	2	89.8	13	2
30	3	46	3	40	3	59.4	56.8	2
30	4	50	4	9	2	61.6	9	2
30	5	40	3	30	3	69.2	11	3
30	6	50	3	25	3	90.2	38.2	4
30	7	50	4	18	3	58.4	27	2
30	8	20	3	7	2	30.4	11.8	2
30	9	54	4	18	3	74.4	25.2	1
30	10	35	4	12	3	76.8	21.2	1
30	11	58	6	8	3	80.2	15.2	1
30	12	28	4	40	6	28	48.6	1
30	13	65	6	20	3	91.8	33.4	2
30	14	20	3	15	3	28.6	15.2	3
30	15	23	3	15	3	25	29	1
30	16	48	4	35	5	95	50.4	3
30	17	42	5	16	3	62	15.4	3
30	18	30	3	20	4	24.2	42	1
30	19	15	2	12	2	34.4	13.4	1
30	20	50	3	21	3	119.2	30	3
30	21	30	3	12	2	28	11.4	3
30	22	30	4	8	2	81.6	11.8	1
30	23	50	5	20	3	108.6	31.8	1
30	24	45	3	6	2	75.2	14	1
30	25	30	3	28	3	22.25	14.75	5
30	26	45	4	20	3	33.5	22.75	4
30	27	40	4	6	2	34	33.75	3
30	28	30	3	8	3	48.38	13.88	1
30	29	70	7	20	3	75.38	19.38	1
30	30	60	5	10	2	74.75	15.88	1
30	31	33	3	10	2	88.5	34.13	3
30	32	29	3	16	2	19.75	15.88	1
30	33	30	3	6	2	78.13	18.5	1
30	34	28	3	7	3	27.5	10.25	2
30	35	70	6	12	3	32.5	15.88	2
30	36	71	6	23	3	66.5	14.63	2
30	37	21	3	12	2	91.88	15.63	2
30	38	30	3	10	2	86.63	29	2
30	39	65	6	12	3	35.63	13.88	2
30	40	23	3	4	2	37.13	11.75	3
30	41	70	6	24	5	25.13	29.25	2
30	42	21	3	11	3	89.38	34.5	1
30	43	66	5	12	4	76.63	12.88	1
30	44	56	6	8	3	48.5	9	1
30	45	10	2	12	4	59.63	13.25	1
30	46	10	2	4	2	60.75	72.63	3
30	47	20	2	3	2	47.38	28.88	2
30	48	34	4	4	2	27.25	19.25	2
